# Supplementary figures and images for: PI3K activation allows immune evasion by promoting an inhibitory myeloid tumor microenvironment
Source: PubMed Central journal article supplement — J Immunother Cancer. 2022 Mar 9;10(3):e003402. doi: 10.1136/jitc-2021-003402 (PMC8915320; doi:10.1136/jitc-2021-003402), 2022-03-09

## Supplementary Figures

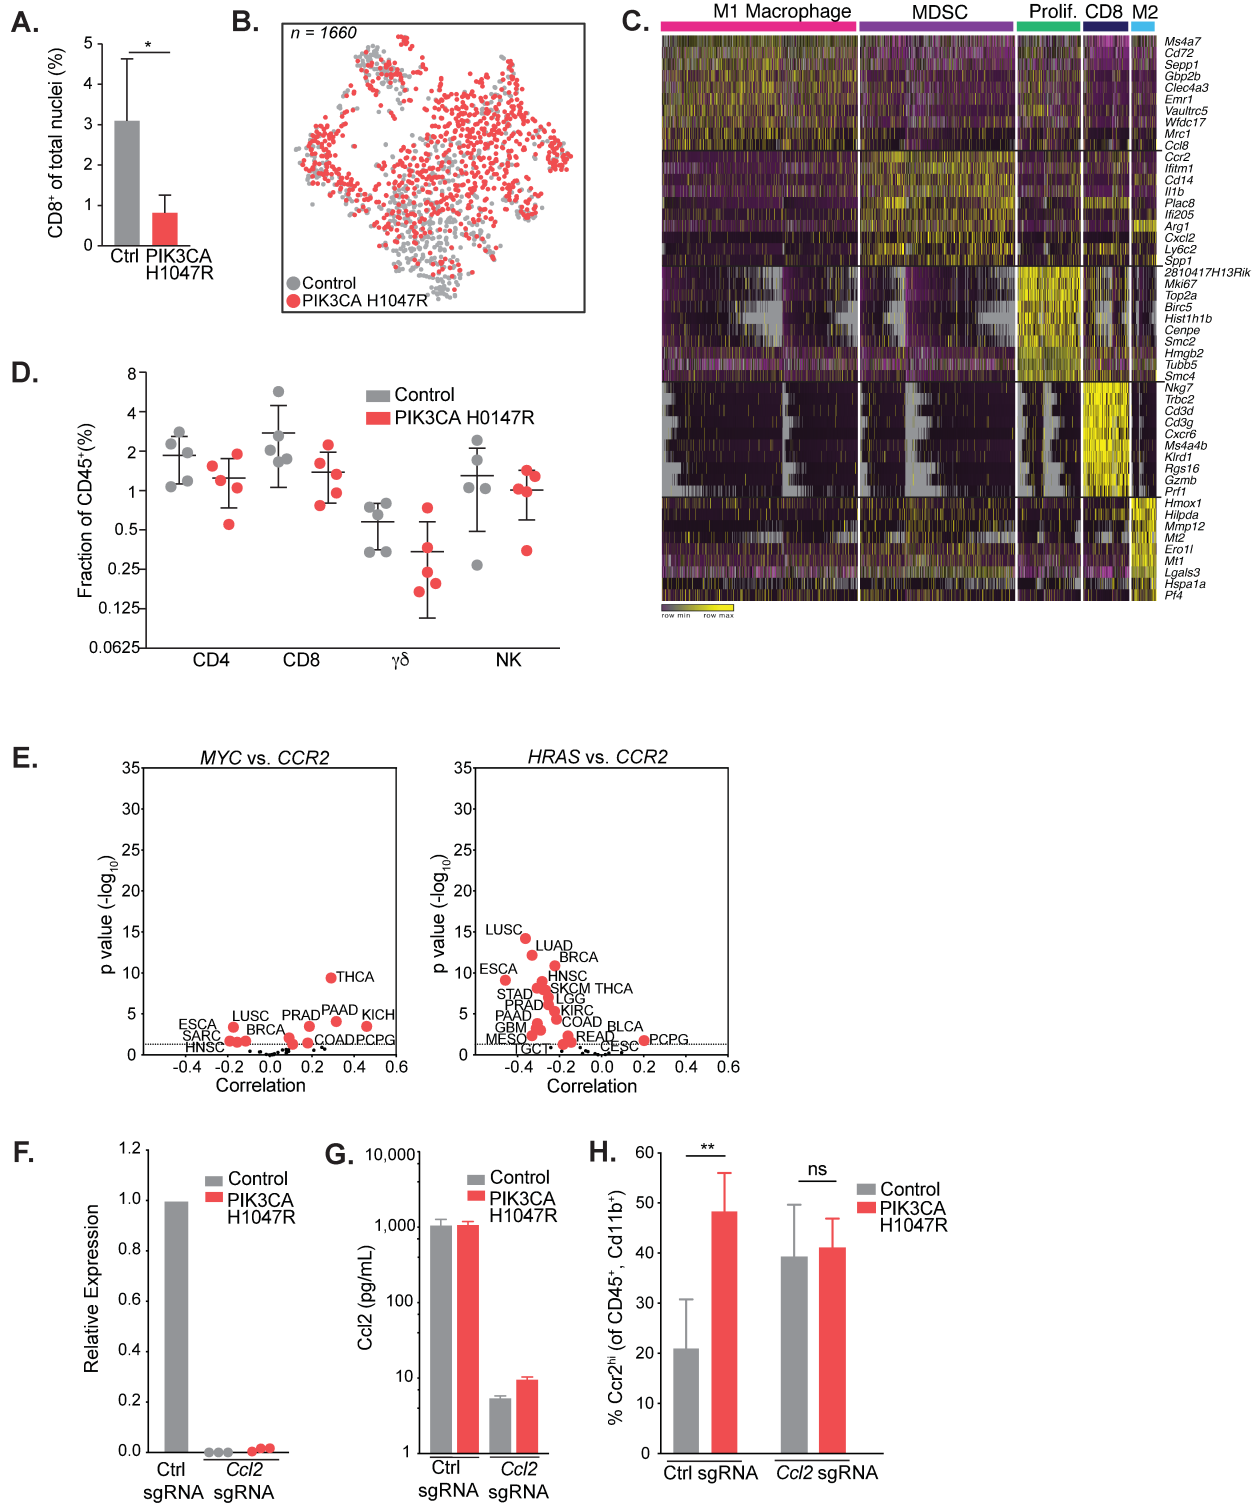

Supplement: jitc-2021-003402supp002.pdf [file jitc-2021-003402supp002.pdf]
